# Supplementary material for: MRI texture features from tumor core and margin in the prediction of response to neoadjuvant chemotherapy in patients with locally advanced breast cancer
Source: PubMed Central journal article supplement (PMC8274727; doi:10.18632/oncotarget.28002), 2021-07-06
Supplement: oncotarget-12-1354-s001.pdf [file oncotarget-12-1354-s001.pdf]

## MRI texture features from tumor core and margin in the prediction of response to neoadjuvant chemotherapy in patients with locally advanced breast cancer

### SUPPLEMENTARY MATERIALS

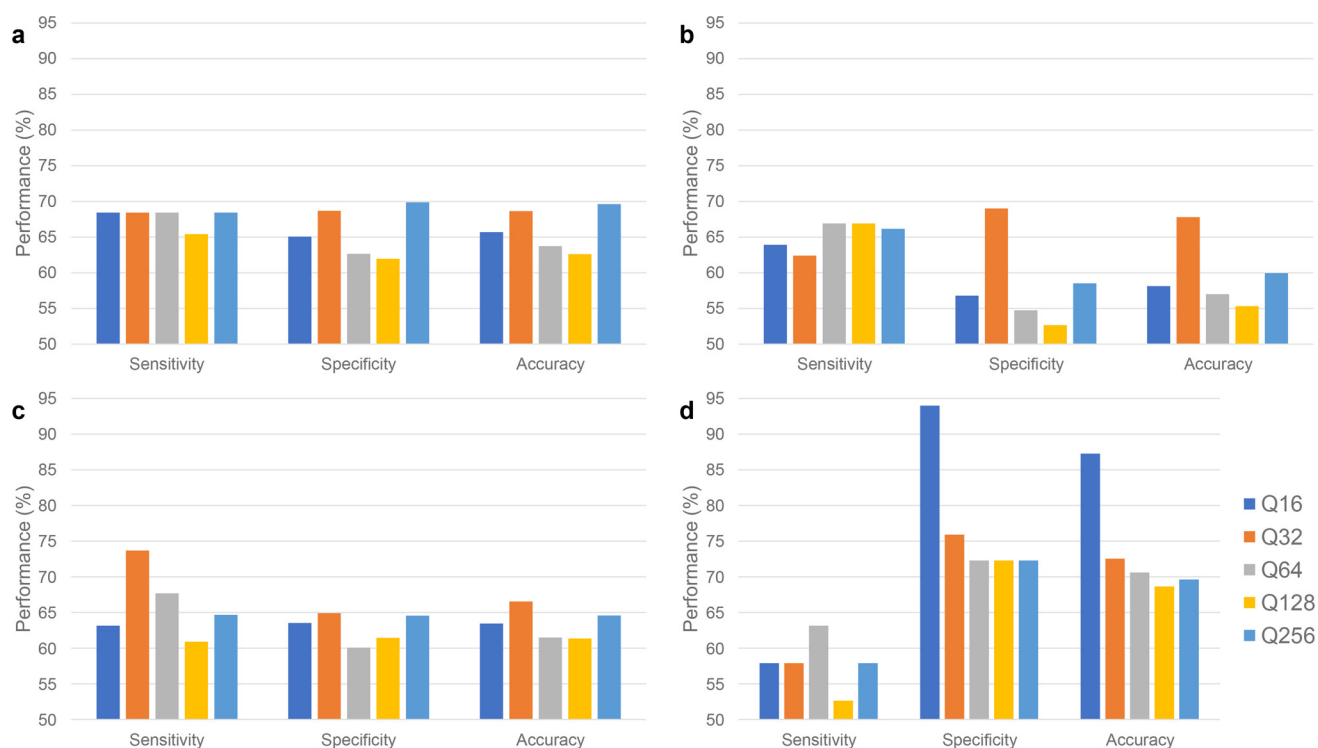

**Supplementary Figure 1A:** Classification performance for FLD (a), SVM-Lin (b), SVM-RBF (c), and kNN (d) with varying quantization. Each bar class represents a different maximum number of grey levels. The optimal classifier was defined as the classifier with the maximum F1-Score. The border selection method used the ROI core, and the pixel distance was fixed at 1 pixel.

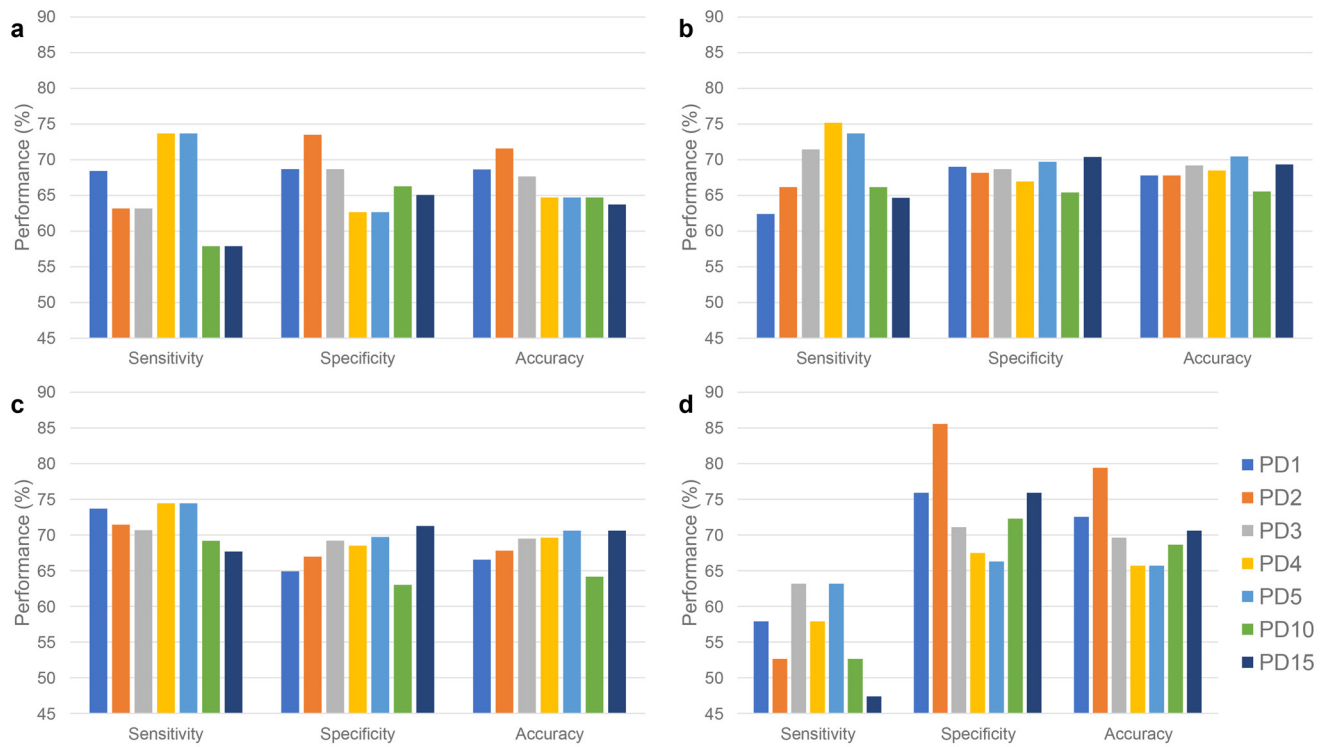

**Supplementary Figure 1B:** Classification performance for FLD (a), SVM-Lin (b), SVM-RBF (c), and kNN (d) with a varying pixel distance. Each bar class represents a different pixel distance in the number of pixels. The optimal classifier was defined as the classifier with the maximum F1-Score. The border selection method used the ROI core, and the quantization was fixed at 32 grey levels.

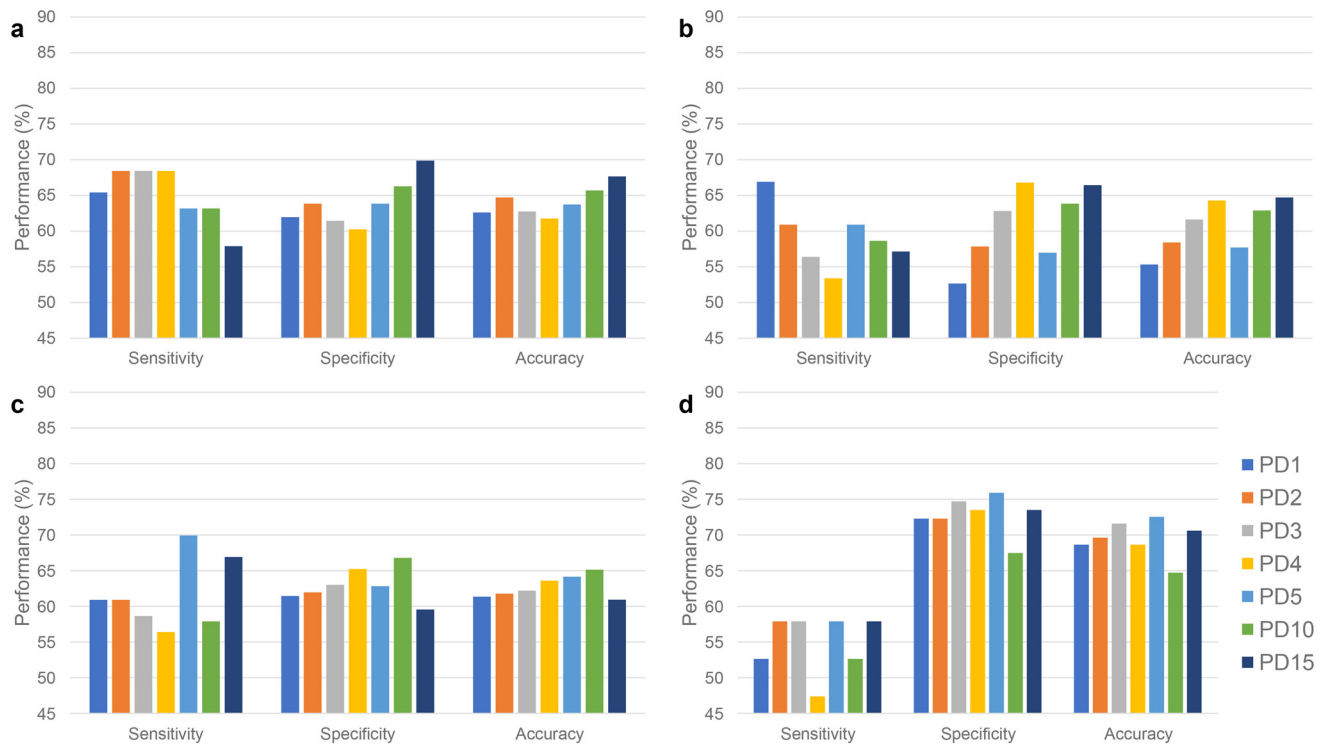

**Supplementary Figure 1C:** Classification performance for FLD (a), SVM-Lin (b), SVM-RBF (c), and kNN (d) with a varying pixel distance. Each bar class represents a different pixel distance in the number of pixels. The optimal classifier was defined as the classifier with the maximum F1-Score. The border selection method used the ROI core, and the quantization was fixed at 128 grey levels.

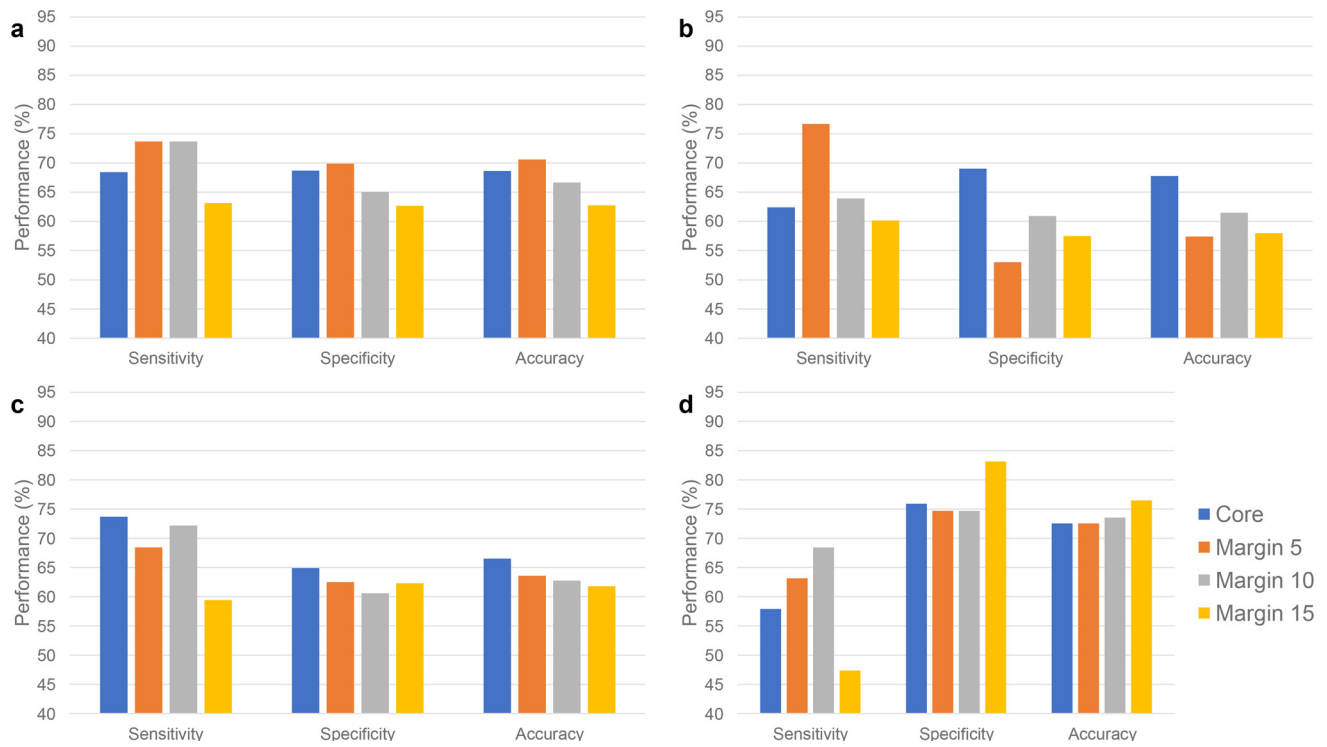

**Supplementary Figure 1D:** Classification performance for FLD (a), SVM-Lin (b), SVM-RBF (c), and kNN (d) with a varying ROI selection method. Each bar class represents the ROI selection method, with Core being the tumor mass and Margin being the tumor margin with a width in pixels. The optimal classifier was defined as the classifier with the maximum F1-Score. The quantization was fixed at 32 grey levels, and the pixel distance was set at 1 pixel.

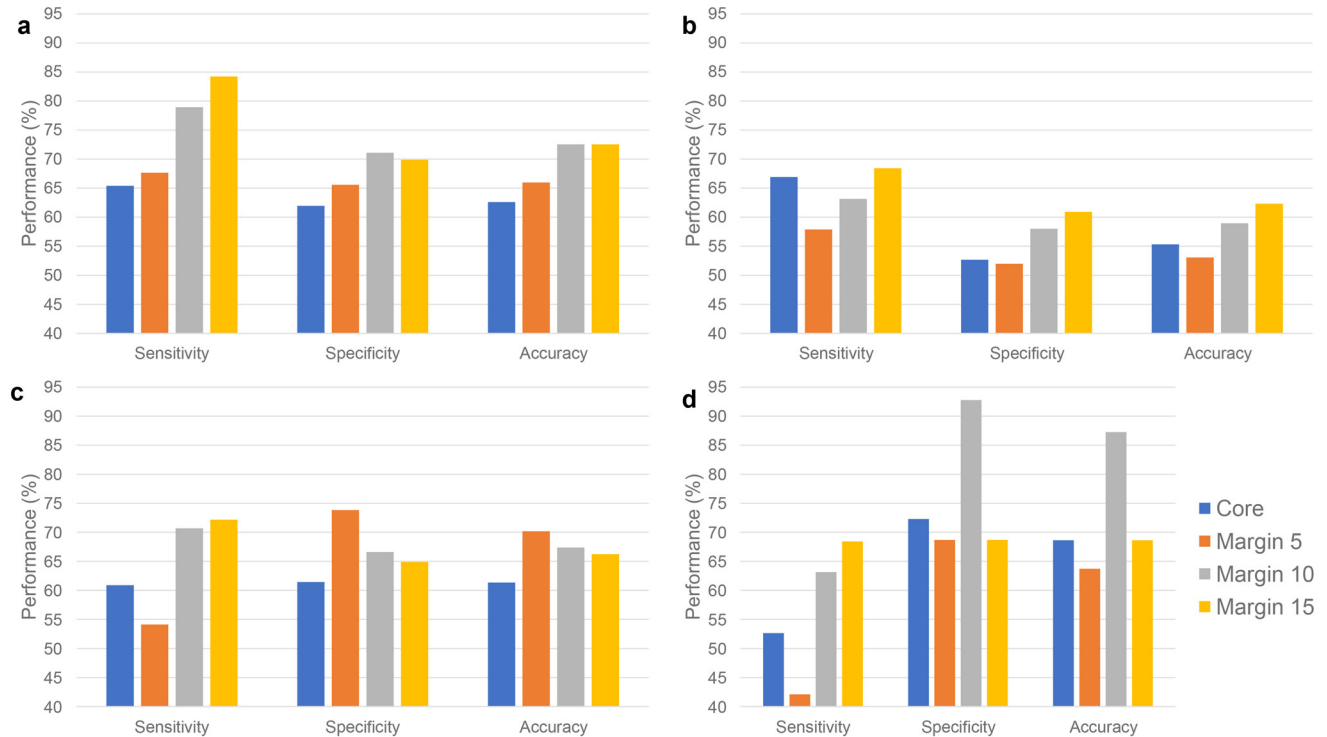

**Supplementary Figure 1E:** Classification performance for FLD (a), SVM-Lin (b), SVM-RBF (c), and kNN (d) with a varying ROI selection method. Each bar class represents the ROI selection method, with Core being the tumor mass and Margin being the tumor margin with a width in pixels. The optimal classifier was defined as the classifier with the maximum F1-Score. The quantization was fixed at 128 grey levels, and the pixel distance was set at 1 pixel.
